# Supplementary material for: Study on the effects of rapamycin and the mTORC1/2 dual inhibitor OSI-027 on the metabolism of colon cancer cells based on UPLC-MS/MS metabolomics
Source: Research Square preprint supplement (doi:10.21203/rs.3.rs-4056963/v1), 2024-03-18
Supplement: Supplementary file 1 [file 76d402b9bc2755adb3bc3f92.docx]

**Supplementary material**

**Study on the effects of rapamycin and the mTORC1/2 dual inhibitor OSI-027 on the metabolism of colon cancer cells based on UPLC-MS/MS metabolomics**

Kai Fan1#, Yueyuan Wang1#, Jiangyujing Bian1, 2, Yewen Sun1, 2, Jiaqi Dou1, Jie Pan1*, Yunli Yu1*

1 Department of Pharmacy, The Second Affiliated Hospital of Soochow University, Suzhou, Jiangsu, People’s Republic of China

2 College of Pharmacy, Soochow University, Suzhou, Jiangsu, People’s Republic of China

#These authors contributed equally to this work.

*Corresponding Author:

Yunli Yu and Jie Pan, Department of Pharmacy, The Second Affiliated Hospital of Soochow University, 1055 San Xiang Road, Suzhou City, 215004, People’s Republic of China. Tel: 86-512-67783467, Email: [haoyyl0902@163.com](mailto:haoyyl0902@163.com) (Yunli Yu); [panzy1122@163.com](mailto:panzy1122@163.com) (Jie Pan)

**Supplementary Table S1** Gradient elution program

| **Time** | **Pos: 0.1%FA-Water**  **Neg: 5mM NH4COOH** | **Pos: 0.1%FA-ACN**  **Neg: ACN** |
| --- | --- | --- |
| 0 | 98 | 2 |
| 1 | 98 | 2 |
| 9 | 50 | 50 |
| 12 | 2 | 98 |
| 13.5 | 2 | 98 |
| 14 | 95 | 2 |
| 20(Pos)/17(Neg) | 98 | 2 |

**Supplementary Table S2** Optimal mass spectrometry parameters

| **Parameters** | **ESI(+)** | **ESI(-)** |
| --- | --- | --- |
| Sheath gas flow rate | 30 | 30 |
| Aux gas flow rate | 10 | 10 |
| Sweep gas flow rate | 0 | 0 |
| Spray voltage | 3.5 KV | -2.5 KV |
| Capillary temp | 325℃ | 325℃ |
| S-lens RF level | 50 | 50 |
| Aux gas heater temp | 300℃ | 300℃ |
